# Supplementary material for: Growth of thermally stable crystalline C60 films on flat-lying copper phthalocyanine
Source: Royal Society of Chemistry journal article supplement (doi:10.1039/c5ta06820g), 2015-12-02
Supplement: c5ta06820g1.pdf [file c5ta06820g1.pdf]

### Supplemental Information

To allow the reader to clearly see the [111] reflection of the (111) orientation at  $Q_{xy} = 0 \text{ \AA}^{-1}$  and  $Q_z = 0.767 \text{ \AA}^{-1}$ , the GIWAXS data from figure 2 was not converted to proper q-space, but instead is only approximately q-space. Thus, the same data, but converted to proper q-space, with missing wedge along the  $Q_z$  axis, has been included in the supplemental information as an additional figure.

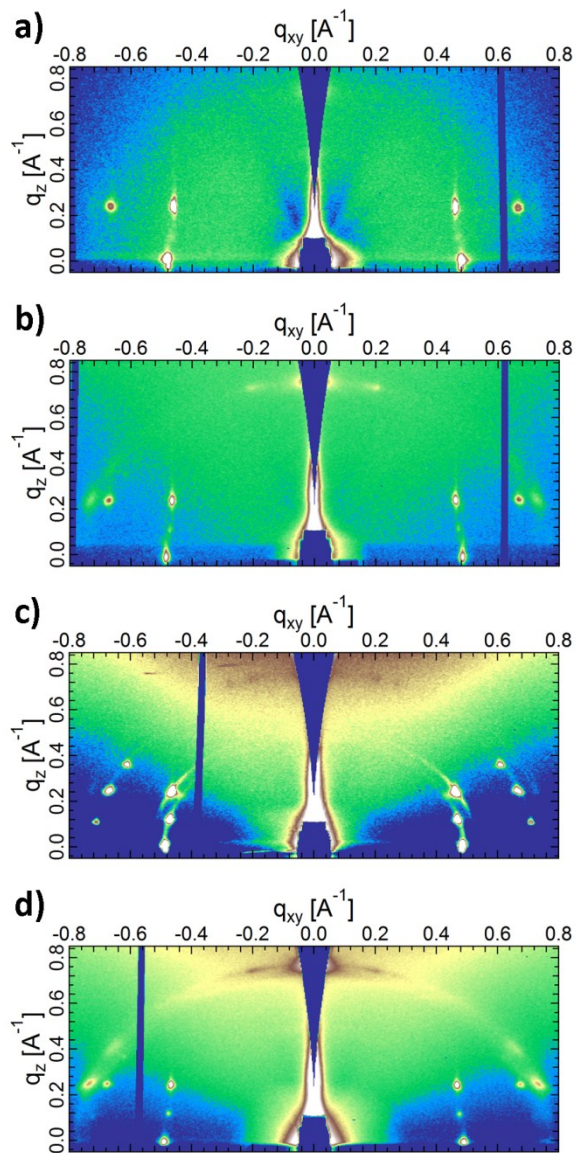

**SI figure 1 Caption:**

GIWAXS data from figure 2, but converted to proper q-space, with missing wedge along the Qz axis, acquired at 0.15 Deg incidence angle on a) 5.5 nm C<sub>60</sub> / 25 nm CuPc / HOPG, b) 30 nm C<sub>60</sub> / 25 nm CuPc / HOPG, c) 30 nm C<sub>60</sub> / 150 nm CuPc / HOPG, d) 150 nm C<sub>60</sub> / 25 nm CuPc / HOPG.
